# Supplementary material
Source: HighWire-hosted journal article supplement (doi:10.1101/rna.080892.125)
Supplement: Supplemental_legends.docx [file Supplemental_legends.docx]

**Supplemental Figure S1: Overview of the NLP representation, MIL formulation, and implementation of the RBP binding prediction task**. (A) Sequence definition and Multiple Instance Learning formulation. Positive and negative observations, derived from matching genomic regions, are deconstructed into their constituent contexts with the novel sequence decomposition method (B-C), then organized into bags. The precise RBP binding region within the positive sequence is highlighted in green and represents the main prediction objective, indicating the specific contexts that confer upon the parent sequence its positive label. (B) The first phase of the sliding window-based sequence decomposition strategy deconstructs a sequence into candidate target *k*-mers. (C) The second phase of sequence decomposition constructs the context elements for each candidate target generated in panel B. (D) Process diagram of the model training and iterative relabeling pipeline.

**Supplemental Figure S2: A novel algorithm for motif and context discovery.** (A) Phase I: Identification of candidate consensuses. (B) Phase II: Identification of candidate motif instances, using position-dependent similar *k*-mers. (C) Phase III: Identification of motif instances with *k*-mer co-occurrence. (D) Phase IV: Motif construction. (E) Phase VI: Context discovery.

**Supplemental Figure S3: A closer inspection of the PABPN1 motif and contexts in HepG2.** (A) Motif (top) and context (bottom) logos for PABPN1 in HepG2. (B) Top 10 motifs discovered by STREME; the known PABPN1 poly(A) motif is absent. The 7th-ranked motif corresponds to our discovered GCUGG motif. (C) Enrichment of eCLIP reads, relative to size-matched input, at discovered motifs and contexts compared to corresponding random control regions. Wilcoxon rank-sum test *p*-values test whether the motifs or contexts have significantly higher eCLIP enrichment than their corresponding control regions.

**Supplemental Figure S4: A closer inspection of the RBFOX2 motif and contexts in K562.** (A) Motif (top) and context (bottom) logos for RBFOX2 in K562. (B) Top 10 motifs discovered by STREME. (C) Enrichment of eCLIP reads, relative to size-matched input control, at discovered motifs and contexts compared to corresponding random control regions. Wilcoxon rank-sum test *p*-values test whether the motifs or contexts have significantly higher eCLIP enrichment than their corresponding control regions.

**Supplemental Figure S5: Motifs discovered from (A) iCLIP, (B) HITS-CLIP, and (C) PAR-CLIP assays**. Datasets for each RBP were downloaded from the following studies. RBFOX2 (H9): [(Wu et al. 2016)](https://paperpile.com/c/LJl7Et/JW62); LSM6 (HEK293): [(Nabeel-Shah et al. 2024)](https://paperpile.com/c/LJl7Et/7u6O); EIF4G1 (K562): [(ENCODE Project Consortium et al. 2020)](https://paperpile.com/c/LJl7Et/TovJ); QKI (mesHMLE): [(Pillman et al. 2018)](https://paperpile.com/c/LJl7Et/Yqod); SRSF1 (H1299): [(Fish et al. 2019)](https://paperpile.com/c/LJl7Et/hrYg); MSI2 (K562): [(Park et al. 2014)](https://paperpile.com/c/LJl7Et/ltFR); ELAVL1 (T24): [(Chen et al. 2019)](https://paperpile.com/c/LJl7Et/FIu8); HNRNPA1 (HEK293T): [(Levengood et al. 2024)](https://paperpile.com/c/LJl7Et/3KYL); IGF2BP1 (HepG2): [(Liu et al. 2024)](https://paperpile.com/c/LJl7Et/4klR3).

**Supplemental Figure S6: Motif discovery for random genomic sequences.** (A) Discovered motif, context, and nucleotide preferences for the random dataset comprising 20,000 total sequences (10,000 “positive” and 10,000 “negative”) derived from the human genome. (B) Top 10 motif hits returned by STREME. (C) Background nucleotide distribution for all 10K “positive” sequences (leftmost column), followed by the background nucleotide distribution for the same 10K sequences stratified by genomic region of origin (remaining 7 columns). The percentage of each genomic region in the dataset is annotated below each region. The context nucleotide preference for As and Us (panel A) reflect the background nucleotide preferences of the positive sequences.

**Supplemental Figure S7: Motif discovery for random synthetic sequences.** (A) Discovered motif, context, and nucleotide preferences from the random dataset comprising 20,000 total sequences (10,000 “positive” and 10,000 “negative”) derived from a uniform distribution of each of the 4 canonical nucleotides. There is no nucleotide preference in the contexts, thus reflecting the underlying uniform distribution. (B) Top 10 motif hits returned by STREME.

**Supplemental Figure S8: Properties of random motif discovery.** (A) Precision-recall (PR) curves for a select subset of 7 sequence-specific RBPs, 3 sets of random genomic sequences of total sizes 2K, 10K, and 20K sequences, and 3 sets of random synthetic sequences of total sizes 2K, 10K, and 20K sequences. (B) PR curves for a set of 6 non-sequence-specific RBPs, 3 sets of random genomic sequences, and 3 sets of random synthetic sequences. (C) Distribution of the enrichments (log2 scale) for the motif consensuses of all RBPs, the select subset of sequence-specific RBPs, non-sequence-specific RBPs, and the random genomic and random synthetic sets. (D) Distribution of the *p*-values (-log10 scale) for the motif consensuses of the same datasets as in panel C.

**Supplemental Figure S9: Properties of random motif discovery, continued.** (A) Distribution of the enrichments for all significantly enriched *k*-mers in the select subset of 7 sequence-specific RBPs and the random genomic and random synthetic sets. (B) Distribution of the *p*-values for all significantly enriched *k*-mers in the same datasets as in panel A. (C) Distribution of the enrichments for all significantly enriched *k*-mers in the subset of 6 non-sequence-specific RBPs and the random genomic and random synthetic sets. (D) Distribution of the *p*-values for all significantly enriched *k*-mers in the same datasets as in panel C.

**Supplemental Figure S10: Investigation of motif clusters.** (A) Distribution of the number of motif instances per sequence for HNRNPK. (B) Positional distribution of motif instances across the full length of the 55nt context sequences, displaying the percent of sequences with a motif instance at each position for HNRNPK. (C) Example sequence with motif instances forming a cluster. (D) Distribution of the number of motif instances per sequence for RBFOX2. (E) Positional distribution of motif instances across the full length of the 55nt context sequences, displaying the percent of sequences with a motif instance at each position for RBFOX2.

**Supplemental Figure S11: Interpretation of KLD values.** (A) Correlation between cross-prediction scores and context KLD values for each RBP-RBP pair that satisfies the cross-prediction conditions defined for interaction discovery. (B) Distribution of context KLD values, stratified by ranges of cross-prediction scores. (C) Histogram of context KLD values for RBP-RBP pairs that satisfy the cross-prediction conditions defined for interaction discovery.

**Supplemental Figure S12: Breakdown of contexts by genomic region.** (A) Breakdown of all contexts (left) and contexts in DE genes (right) by genomic region for UPF1. (B) Breakdown of all contexts (left) and contexts in DE genes (right) by genomic region for CSTF2T. (C) Breakdown of all contexts (left) and contexts in DE genes (right) by genomic region for IGF2BP3.

**Supplemental Figure S13: Breakdown of detected splicing events across all 60 RBPs in our HepG2 dataset that have shRNA-seq knockdown (KD) data**. (A) Barplot of the number of splicing events detected by rMATS for each RBP, stratified by event type. Skipped exon (SE) events represent approximately 70% of events across RBPs. (B) Barplot of the number of SE splicing events that passed filtering criteria (**Materials and Methods**).

**Supplemental Figure S14: Breakdown of detected differentially spliced (DS) skipped exon (SE) events across all 60 RBPs in our HepG2 dataset that have shRNA-seq knockdown (KD) data.** (A) Barplot of the number of differentially spliced (DS) skipped exon (SE) events detected for each RBP. (B) Barplot of the percent of filtered SE events (**Supplemental Figure S13B**) that are differentially spliced. (C) Breakdown of the percentages of directional differential splicing regulation for each RBP. Up-regulated signifies a positive deltaPSI and increased exon inclusion, while down-regulated signifies a negative deltaPSI and decreased exon inclusion (i.e., increased exon skipping).

**Supplemental Figure S15: *k*-mer enrichment in differentially spliced (DS) skipped exon (SE) events for RBFOX2.** (A) Event-centric *k*-mer enrichment. All enriched and depleted *k*-mers are labeled. (B) Context-centric *k*-mer enrichment. Only enriched and depleted RBFOX2 motif instances are labeled.

**Supplemental Figure S16: *k*-mer enrichment in differentially spliced (DS) skipped exon (SE) events for QKI.** (A) Event-centric *k*-mer enrichment. All enriched and depleted *k*-mers are labeled. (B) Context-centric *k*-mer enrichment. Only enriched and depleted QKI motif instances are labeled.

**Supplemental Figure S17: Inspection of the peak overlap-centric method for RBP-RBP interaction discovery**. (A) Comparison of the distribution of bidirectional cross-prediction scores [left: RBP1’s predictions on RBP2’s contexts; right: RBP2’s predictions on RBP1’s contexts] for RBP-RBP interactions discovered by this work (green) and interactions discovered by using peak overlaps alone (orange). Statistical testing performed using a Wilcoxon test. (B) Histogram of eCLIP peak lengths for peaks from all RBPs in HepG2 that were used in this study. (C) Distribution of eCLIP peak lengths for peaks from each RBP in HepG2 that were used in this study. Statistical differences (assessed by the Wilcoxon test) are present between distributions (not shown).

**Supplemental Figure S18: eCLIP read enrichments supporting the proposed interaction between AKAP1 and UPF1.** (A) Nested violin-boxplots of the distribution of (A) log2(AKAP1 eCLIP read enrichment over size-matched input [SMInput]) and (B) log2(UPF1 eCLIP read enrichment over SMInput) for (i) AKAP1 contexts that do not overlap with UPF1 contexts (orange), (ii) AKAP1 contexts that overlap with UPF1 contexts (green, left), (iii) UPF1 contexts that overlap with AKAP1 contexts (green, right), and (iv) UPF1 contexts that do not overlap with AKAP1 contexts. In panel A, Wilcoxon rank-sum test *p*-values test whether the distribution on the right-hand side is significantly greater than the distribution on the right-hand side. In panel B, Wilcoxon rank-sum test *p*-values test whether the distribution on the right-hand side is significantly greater than the distribution on the left-hand side.
