# Supplementary material
Source: HighWire-hosted journal article supplement (doi:10.1101/rna.080892.125)
Supplement: Supplemental_References.docx [file Supplemental_References.docx]

**REFERENCES (Supplemental Materials)**

[Attig J, Agostini F, Gooding C, Chakrabarti AM, Singh A, Haberman N, Zagalak JA, Emmett W, Smith CWJ, Luscombe NM, et al. 2018. Heteromeric RNP assembly at LINEs controls lineage-specific RNA processing. *Cell* **174**: 1067–1081.e17.](http://paperpile.com/b/LJl7Et/t9TY)

[Chen X, Li A, Sun B-F, Yang Y, Han Y-N, Yuan X, Chen R-X, Wei W-S, Liu Y, Gao C-C, et al. 2019. 5-methylcytosine promotes pathogenesis of bladder cancer through stabilizing mRNAs. *Nat Cell Biol* **21**: 978–990.](http://paperpile.com/b/LJl7Et/FIu8)

[Chi B, O’Connell JD, Yamazaki T, Gangopadhyay J, Gygi SP, Reed R. 2018. Interactome analyses revealed that the U1 snRNP machinery overlaps extensively with the RNAP II machinery and contains multiple ALS/SMA-causative proteins. *Sci Rep* **8**.](http://paperpile.com/b/LJl7Et/jjQq) <http://dx.doi.org/10.1038/s41598-018-27136-3>[.](http://paperpile.com/b/LJl7Et/jjQq)

[Chollet F, Others. 2015. Keras.](http://paperpile.com/b/LJl7Et/3wHU) <https://keras.io>[.](http://paperpile.com/b/LJl7Et/3wHU)

[Coelho MB, Attig J, Bellora N, König J, Hallegger M, Kayikci M, Eyras E, Ule J, Smith CWJ. 2015. Nuclear matrix protein Matrin3 regulates alternative splicing and forms overlapping regulatory networks with PTB. *EMBO J* **34**: 653–668.](http://paperpile.com/b/LJl7Et/qY3T)

[Crooks GE, Hon G, Chandonia J-M, Brenner SE. 2004. WebLogo: a sequence logo generator. *Genome Res* **14**: 1188–1190.](http://paperpile.com/b/LJl7Et/LPOH)

[D’haeseleer P. 2006a. How does DNA sequence motif discovery work? *Nat Biotechnol* **24**: 959–961.](http://paperpile.com/b/LJl7Et/oDFgD)

[D’haeseleer P. 2006b. What are DNA sequence motifs? *Nat Biotechnol* **24**: 423–425.](http://paperpile.com/b/LJl7Et/ytz5)

[ENCODE Project Consortium, Moore JE, Purcaro MJ, Pratt HE, Epstein CB, Shoresh N, Adrian J, Kawli T, Davis CA, Dobin A, et al. 2020. Expanded encyclopaedias of DNA elements in the human and mouse genomes. *Nature* **583**: 699–710.](http://paperpile.com/b/LJl7Et/TovJ)

[Fish L, Navickas A, Culbertson B, Xu Y, Nguyen HCB, Zhang S, Hochman M, Okimoto R, Dill BD, Molina H, et al. 2019. Nuclear TARBP2 drives oncogenic dysregulation of RNA splicing and decay. *Mol Cell* **75**: 967–981.e9.](http://paperpile.com/b/LJl7Et/hrYg)

[Folci A, Mapelli L, Sassone J, Prestori F, D’Angelo E, Bassani S, Passafaro M. 2014. Loss of hnRNP K impairs synaptic plasticity in hippocampal neurons. *J Neurosci* **34**: 9088–9095.](http://paperpile.com/b/LJl7Et/bldR)

[Foulds J, Frank E. 2010. A review of multi-instance learning assumptions. *Knowl Eng Rev* **25**: 1–25.](http://paperpile.com/b/LJl7Et/8sNQ)

[Ginsberg MD, Feliciello A, Jones JK, Avvedimento EV, Gottesman ME. 2003. PKA-dependent binding of mRNA to the mitochondrial AKAP121 protein. *J Mol Biol* **327**: 885–897.](http://paperpile.com/b/LJl7Et/60Ry)

[Grau J, Grosse I, Keilwagen J. 2015. PRROC: computing and visualizing precision-recall and receiver operating characteristic curves in R. *Bioinformatics* **31**: 2595–2597.](http://paperpile.com/b/LJl7Et/588W)

[Iradi MCG, Triplett JC, Thomas JD, Davila R, Crown AM, Brown H, Lewis J, Swanson MS, Xu G, Rodriguez-Lebron E, et al. 2018. Characterization of gene regulation and protein interaction networks for Matrin 3 encoding mutations linked to amyotrophic lateral sclerosis and myopathy. *Sci Rep* **8**.](http://paperpile.com/b/LJl7Et/UZlY) <http://dx.doi.org/10.1038/s41598-018-21371-4>[.](http://paperpile.com/b/LJl7Et/UZlY)

[Leal G, Comprido D, de Luca P, Morais E, Rodrigues L, Mele M, Santos AR, Costa RO, Pinto MJ, Patil S, et al. 2017. The RNA-binding protein hnRNP K mediates the effect of BDNF on dendritic mRNA metabolism and regulates synaptic NMDA receptors in hippocampal neurons. *eNeuro* **4**.](http://paperpile.com/b/LJl7Et/WEic) <http://dx.doi.org/10.1523/ENEURO.0268-17.2017>[.](http://paperpile.com/b/LJl7Et/WEic)

[Levengood JD, Potoyan D, Penumutchu S, Kumar A, Zhou Q, Wang Y, Hansen AL, Kutluay S, Roche J, Tolbert BS. 2024. Thermodynamic coupling of the tandem RRM domains of hnRNP A1 underlie its pleiotropic RNA binding functions. *Sci Adv* **10**: eadk6580.](http://paperpile.com/b/LJl7Et/3KYL)

[Liu Y, Gervasi C, Szaro BG. 2008. A crucial role for hnRNP K in axon development in Xenopus laevis. *Development* **135**: 3125–3135.](http://paperpile.com/b/LJl7Et/K2ak)

[Liu Y, Szaro BG. 2011. hnRNP K post-transcriptionally co-regulates multiple cytoskeletal genes needed for axonogenesis. *Development* **138**: 3079–3090.](http://paperpile.com/b/LJl7Et/Iox7)

[Malinová A, Cvačková Z, Matějů D, Hořejší Z, Abéza C, Vandermoere F, Bertrand E, Staněk D, Verheggen C. 2017. Assembly of the U5 snRNP component PRPF8 is controlled by the HSP90/R2TP chaperones. *J Cell Biol* **216**: 1579–1596.](http://paperpile.com/b/LJl7Et/SIUJ)

[Moore JE, Pratt HE, Purcaro MJ, Weng Z. 2020. A curated benchmark of enhancer-gene interactions for evaluating enhancer-target gene prediction methods. *Genome Biol* **21**: 17.](http://paperpile.com/b/LJl7Et/IKqj)

[Nabeel-Shah S, Pu S, Burns JD, Braunschweig U, Ahmed N, Burke GL, Lee H, Radovani E, Zhong G, Tang H, et al. 2024. C2H2-zinc-finger transcription factors bind RNA and function in diverse post-transcriptional regulatory processes. *Mol Cell* **84**: 3810–3825.e10.](http://paperpile.com/b/LJl7Et/7u6O)

[Park S-M, Deering RP, Lu Y, Tivnan P, Lianoglou S, Al-Shahrour F, Ebert BL, Hacohen N, Leslie C, Daley GQ, et al. 2014. Musashi-2 controls cell fate, lineage bias, and TGF-β signaling in HSCs. *J Exp Med* **211**: 71–87.](http://paperpile.com/b/LJl7Et/ltFR)

[Pedregosa F, Varoquaux G, Gramfort A, Michel V, Thirion B, Grisel O, Blondel M, Prettenhofer P, Weiss R, Dubourg V, et al. 2011. Scikit-learn: Machine Learning in Python. *Journal of Machine Learning Research* **12**: 2825–2830.](http://paperpile.com/b/LJl7Et/Zb25)

[Pillman KA, Phillips CA, Roslan S, Toubia J, Dredge BK, Bert AG, Lumb R, Neumann DP, Li X, Conn SJ, et al. 2018. miR-200/375 control epithelial plasticity-associated alternative splicing by repressing the RNA-binding protein Quaking. *EMBO J* **37**.](http://paperpile.com/b/LJl7Et/Yqod) <http://dx.doi.org/10.15252/embj.201899016>[.](http://paperpile.com/b/LJl7Et/Yqod)

[Proepper C, Steinestel K, Schmeisser MJ, Heinrich J, Steinestel J, Bockmann J, Liebau S, Boeckers TM. 2011. Heterogeneous nuclear ribonucleoprotein k interacts with Abi-1 at postsynaptic sites and modulates dendritic spine morphology. *PLoS One* **6**: e27045.](http://paperpile.com/b/LJl7Et/3ug4)

[Qi Y, Wang M, Jiang Q. 2022. PABPC1--mRNA stability, protein translation and tumorigenesis. *Front Oncol* **12**: 1025291.](http://paperpile.com/b/LJl7Et/qbnc)

[Qin Y, Hou Y, Liu S, Zhu P, Wan X, Zhao M, Peng M, Zeng H, Li Q, Jin T, et al. 2022. A novel long non-coding RNA lnc030 maintains breast cancer stem cell stemness by stabilizing SQLE mRNA and increasing cholesterol synthesis. *Adv Sci (Weinh)* **9**: e2204046.](http://paperpile.com/b/LJl7Et/ZPvZ)

[Rath S, Sharma R, Gupta R, Ast T, Chan C, Durham TJ, Goodman RP, Grabarek Z, Haas ME, Hung WHW, et al. 2021. MitoCarta3.0: an updated mitochondrial proteome now with sub-organelle localization and pathway annotations. *Nucleic Acids Res* **49**: D1541–D1547.](http://paperpile.com/b/LJl7Et/2Jy8)

[Tareen A, Kinney JB. 2020. Logomaker: beautiful sequence logos in Python. *Bioinformatics* **36**: 2272–2274.](http://paperpile.com/b/LJl7Et/6wrs)

[Tompa M. 1999. An exact method for finding short motifs in sequences, with application to the ribosome binding site problem. *Proc Int Conf Intell Syst Mol Biol* 262–271.](http://paperpile.com/b/LJl7Et/7R0j)

[Turnham RE, Scott JD. 2016. Protein kinase A catalytic subunit isoform PRKACA; History, function and physiology. *Gene* **577**: 101–108.](http://paperpile.com/b/LJl7Et/Kvja)

[Wu H, Yin Q-F, Luo Z, Yao R-W, Zheng C-C, Zhang J, Xiang J-F, Yang L, Chen L-L. 2016. Unusual processing generates SPA LncRNAs that sequester multiple RNA binding proteins. *Mol Cell* **64**: 534–548.](http://paperpile.com/b/LJl7Et/JW62)

[Yang B, Wu Y, Chen Y, Li Y, Wang J, Cha X, Liu J. 2023. MiR-5195-3p targets the PCBP2/PI3K/AKT pathway to inhibit melanoma cell proliferation and migration. *Heliyon* **9**: e19227.](http://paperpile.com/b/LJl7Et/KMPe)

[Zhao H, Wei Z, Shen G, Chen Y, Hao X, Li S, Wang R. 2022. Poly(rC)-binding proteins as pleiotropic regulators in hematopoiesis and hematological malignancy. *Front Oncol* **12**: 1045797.](http://paperpile.com/b/LJl7Et/bMNd)
